# Supplementary material for: Assessment of impact of the COVID-19 pandemic from the perspective of patients with rheumatic and musculoskeletal diseases in Europe: results from the REUMAVID study (phase 1)
Source: PubMed Central journal article supplement — RMD Open. 2021 Apr 7;7(1):e001546. doi: 10.1136/rmdopen-2020-001546 (PMC8029094; doi:10.1136/rmdopen-2020-001546), 2021-04-07
Supplement: rmdopen-2020-001546supp001.pdf [file rmdopen-2020-001546supp001.pdf]

**Supplementary Table 1.** Distribution of rheumatic diseases across countries (N: 1,800)

| Condition                                | n (%)      |            |            |           |           |           |            |
|------------------------------------------|------------|------------|------------|-----------|-----------|-----------|------------|
|                                          | UK         | Spain      | France     | Greek     | Cyprus    | Italy     | Portugal   |
| Axial Spondyloarthritis                  | 249 (44.6) | 253 (54.5) | 90 (39.3)  | 3 (5.3)   | 2 (2.0)   | 32 (25.2) | 41 (15.5)  |
| Rheumatoid Arthritis                     | 246 (44.1) | 84 (18.1)  | 34 (14.8)  | 26 (45.6) | 47 (46.5) | 30 (23.6) | 67 (25.4)  |
| Osteoarthritis                           | 143 (25.6) | 29 (6.3)   | 102 (44.5) | 0 (0.0)   | 8 (7.9)   | 15 (11.8) | 13 (4.9)   |
| Fibromyalgia                             | 53 (9.5)   | 14 (3.0)   | 26 (11.4)  | 14 (24.6) | 28 (27.7) | 53 (41.7) | 124 (47.0) |
| Psoriatic Arthritis                      | 38 (6.6)   | 40 (8.6)   | 32 (14.0)  | 2 (3.5)   | 0 (0.0)   | 37 (29.1) | 16 (6.1)   |
| Osteoporosis                             | 50 (9.0)   | 3 (0.6)    | 20 (8.7)   | 2 (3.5)   | 9 (8.9)   | 18 (14.2) | 12 (4.5)   |
| Systemic Lupus Erythematosus             | 2 (0.4)    | 9 (1.9)    | 1 (0.4)    | 20 (35.1) | 19 (18.8) | 6 (4.7)   | 40 (15.2)  |
| Sjögren's Syndrome                       | 35 (6.3)   | 2 (0.4)    | 12 (5.2)   | 8 (14.0)  | 8 (7.9)   | 15 (11.8) | 24 (9.1)   |
| Juvenile Idiopathic Arthritis            | 6 (1.1)    | 13 (2.8)   | 1 (0.4)    | 5 (8.8)   | 4 (4.0)   | 6 (4.7)   | 3 (1.1)    |
| Gout                                     | 15 (2.7)   | 0 (0.0)    | 5 (2.2)    | 3 (5.3)   | 11 (10.9) | 1 (0.8)   | 1 (0.4)    |
| Peripheral Spondyloarthritis             | 6 (1.1)    | 12 (1.6)   | 22 (9.6)   | 1 (1.8)   | 0 (0.0)   | 5 (3.9)   | 4 (1.5)    |
| Polymyalgia Rheumatica                   | 5 (0.9)    | 0 (0.0)    | 2 (0.9)    | 0 (0.0)   | 1 (1.0)   | 3 (2.4)   | 2 (0.8)    |
| Systemic Sclerosis (or Scleroderma)      | 1 (0.2)    | 2 (0.4)    | 1 (0.4)    | 1 (1.8)   | 9 (8.9)   | 9 (7.1)   | 7 (2.7)    |
| Vasculitis or Arteritis                  | 4 (0.7)    | 1 (0.2)    | 4 (1.7)    | 3 (5.3)   | 2 (2.0)   | 3 (2.4)   | 7 (2.7)    |
| Myositis (Polymyositis, Dermatomyositis) | 0 (0.0)    | 2 (0.4)    | 0 (0.0)    | 1 (1.8)   | 0 (0.0)   | 3 (2.4)   | 1 (0.4)    |
| SAPHO (only for France)                  | 0 (0.0)    | 0 (0.0)    | 15 (6.6)   | 0 (0.0)   | 0 (0.0)   | 0 (0.0)   | 0 (0.0)    |

**Supplementary Table 2.** Sociodemographic and clinical characteristics among rheumatic diseases

| Rheumatic disease             | n (%) or mean $\pm$ SD |            |            |                            |                         |               |                 |                 |                    |
|-------------------------------|------------------------|------------|------------|----------------------------|-------------------------|---------------|-----------------|-----------------|--------------------|
|                               | Sociodemographic       |            |            |                            | Clinical                |               |                 |                 |                    |
|                               | Age                    | Female     | University | Married/ in a relationship | Disease activity (0-10) | Pain (0-10)   | Poor well-being | Risk of Anxiety | Risk of Depression |
| Axial Spondyloarthritis       | 49.4 $\pm$ 12.7        | 484 (72.3) | 316 (47.2) | 482 (71.9)                 | 5.4 $\pm$ 2.5           | 5.9 $\pm$ 2.9 | 361 (54.2)      | 375 (56.7)      | 292 (44.2)         |
| Rheumatoid Arthritis          | 57.0 $\pm$ 12.6        | 464 (87.1) | 264 (49.4) | 360 (67.4)                 | 4.8 $\pm$ 2.8           | 5.5 $\pm$ 3.2 | 262 (49.7)      | 280 (53.2)      | 227 (43.2)         |
| Fibromyalgia                  | 48.8 $\pm$ 10.8        | 287 (92.0) | 138 (44.2) | 203 (65.1)                 | 5.9 $\pm$ 2.7           | 6.7 $\pm$ 2.8 | 129 (42.2)      | 206 (67.3)      | 173 (56.5)         |
| Osteoarthritis                | 62.6 $\pm$ 11.2        | 256 (82.6) | 161 (51.9) | 197 (63.5)                 | 5.4 $\pm$ 2.6           | 6.2 $\pm$ 2.8 | 151 (49.0)      | 164 (53.6)      | 137 (44.8)         |
| Psoriatic Arthritis           | 52.2 $\pm$ 10.9        | 136 (82.9) | 69 (41.8)  | 111 (67.3)                 | 5.9 $\pm$ 2.7           | 6.7 $\pm$ 2.8 | 67 (41.1)       | 92 (56.4)       | 76 (46.6)          |
| Osteoporosis                  | 63.4 $\pm$ 11.4        | 104 (91.2) | 55 (48.2)  | 67 (58.8)                  | 5.2 $\pm$ 2.8           | 5.9 $\pm$ 2.9 | 43 (38.1)       | 64 (56.6)       | 48 (42.5)          |
| Sjögren's Syndrome            | 55.2 $\pm$ 13.0        | 98 (94.2)  | 53 (51.0)  | 70 (67.3)                  | 5.8 $\pm$ 2.5           | 6.8 $\pm$ 2.6 | 43 (41.7)       | 64 (62.1)       | 51 (49.5)          |
| Systemic Lupus Erythematosus  | 47.0 $\pm$ 11.0        | 91 (93.8)  | 47 (48.5)  | 67 (69.1)                  | 5.2 $\pm$ 2.8           | 6.1 $\pm$ 2.8 | 38 (39.2)       | 56 (57.7)       | 50 (51.5)          |
| Peripheral Spondyloarthritis  | 49.3 $\pm$ 12.8        | 41 (82.0)  | 23 (46.0)  | 36 (72.0)                  | 6.1 $\pm$ 2.6           | 6.7 $\pm$ 2.6 | 18 (36.7)       | 25 (51.0)       | 24 (49.0)          |
| Juvenile Idiopathic Arthritis | 42.7 $\pm$ 16.5        | 29 (76.3)  | 15 (39.5)  | 26 (68.4)                  | 4.5 $\pm$ 2.6           | 5.9 $\pm$ 2.5 | 19 (51.4)       | 18 (48.6)       | 19 (51.4)          |
| Gout                          | 52.8 $\pm$ 15.2        | 27 (75.0)  | 15 (41.7)  | 22 (61.1)                  | 6.4 $\pm$ 2.8           | 6.9 $\pm$ 2.7 | 18 (50.0)       | 19 (52.8)       | 19 (52.8)          |

| Rheumatic disease                        | n (%) or mean $\pm$ SD |           |            |                            |                         |               |                 |                 |                    |
|------------------------------------------|------------------------|-----------|------------|----------------------------|-------------------------|---------------|-----------------|-----------------|--------------------|
|                                          | Sociodemographic       |           |            |                            | Clinical                |               |                 |                 |                    |
|                                          | Age                    | Female    | University | Married/ in a relationship | Disease activity (0-10) | Pain (0-10)   | Poor well-being | Risk of Anxiety | Risk of Depression |
| Systemic Sclerosis (or Scleroderma)      | 52.8 $\pm$ 11.7        | 25 (83.3) | 15 (50.0)  | 23 (76.7)                  | 4.8 $\pm$ 3.3           | 5.9 $\pm$ 3.2 | 11 (36.7)       | 21 (70.0)       | 13 (43.3)          |
| Vasculitis or Arteritis                  | 52.5 $\pm$ 14.7        | 19 (79.2) | 14 (58.3)  | 18 (75.0)                  | 5.4 $\pm$ 2.4           | 5.7 $\pm$ 2.6 | 8 (33.3)        | 16 (66.7)       | 10 (41.7)          |
| Polymyalgia Rheumatica                   | 62.8 $\pm$ 10.8        | 11 (84.6) | 6 (46.2)   | 8 (61.5)                   | 6.0 $\pm$ 3.3           | 6.7 $\pm$ 3.6 | 3 (23.1)        | 8 (61.5)        | 8 (61.5)           |
| Myositis (Polymyositis, Dermatomyositis) | 49.0 $\pm$ 11.1        | 5 (71.4)  | 2 (28.6)   | 6 (85.7)                   | 4.9 $\pm$ 2.3           | 6.8 $\pm$ 2.3 | 5 (71.4)        | 3 (42.9)        | 2 (28.6)           |
| SAPHO (only captured in France)          | 52.5 $\pm$ 12.8        | 14 (93.3) | 11 (73.3)  | 12 (80.0)                  | 6.1 $\pm$ 2.6           | 7.2 $\pm$ 2.1 | 7 (46.7)        | 6 (40.0)        | 5 (33.3)           |
